# Supplementary material for: The Histone Demethylase LSD1/ΚDM1A Mediates Chemoresistance in Breast Cancer via Regulation of a Stem Cell Program
Source: Cancers (Basel). 2019 Oct 17;11(10):1585. doi: 10.3390/cancers11101585 (PMC6827056; doi:10.3390/cancers11101585)
Supplement: Supplementary file 1 [file cancers-11-01585-s001.pdf]

## Supplementary Materials

### The histone demethylase LSD1/KDM1A mediates chemoresistance in breast cancer via regulation of a stem cell program

John Verigos, Panagiotis Karakaidos, Dimitris Kordias, Alexandra Papoudou-Bai, Zoi Evangelou, Haralampos V. Harissis, Apostolos Klinakis and Angeliki Magklara

**Figure S1. Supplementary Figure 1:** Oncomine analyses of breast cancer databases. Box plots show that LSD1 is overexpressed in aggressive breast carcinomas: **(A)** Gluck breast cancer database [38]. Invasive breast carcinomas vs. Normal, fold-change=1.7 ( $p<0.005$ ). **(B)** Curtis breast cancer database [39]. Invasive Ductal Breast Carcinoma vs. Normal, fold-change = 1.328 ( $p<0.005$ ) and Invasive Lobular Breast Carcinoma vs. Normal, fold-change = 1.214 ( $p<0.005$ ). **(C)** Sorlie breast cancer database [40] and **(D)** Desmedt database [41] grouped by tumor grade. There is a trend high grade tumors to exhibit higher LSD1 expression. Numbers in parentheses indicate the number of samples. The y-axis represents log<sub>2</sub> median-centered intensity (normalized expression). Shaded boxes represent the interquartile range (25th–75th percentile). Whiskers represent the 10th–90th percentile. The bars denote the median. (adapted from [www.oncomine.org](http://www.oncomine.org))

**Figure S2. Western blot analysis of protein lysates after siRNA mediated knock-down of LSD1** in **(A)** MCF-7 and **(B)** MDA-MB-468 cells. Total protein lysate was isolated 5 days post-transfection. Scramble siRNA transfected cells served as mock control. Western blot analysis of protein lysates after overexpression of LSD1 in **(C)** MCF-7 and **(D)** MDA-MB-468 cells. The protein lysates were collected 3 days post-transfection. Cells transfected with empty vector served as control.

**Figure S3. Treatment with anticancer drugs enriches the bCSC sub-population.** **(A)** MCF-7 and MDA-MB-468 cells were treated with 2.5  $\mu$ M Doxorubicin (2 days) or 15  $\mu$ M Paclitaxel (6 days). On the last day of treatment the number of live cells was counted. **(B)** The surviving cells were subjected to FACS analysis for the CD44 and CD24 surface markers and quantitation of the data is shown. Vehicle-treated cells served as control (set to 1).

**Figure S4. LSD1 regulates the stemness properties of bCSCs** **(A)** Western blot analysis of protein lysates after siRNA mediated knock-down of LSD1 in MCF-7 and MDA-MB-468 cells. Total protein lysate was isolated 7 days post-transfection. **(B)** shRNAs sequences used for LSD1 stable knock-down. **(C)** Western blot analysis of total protein lysates for shLSD1 knock-down stable cell lines. **(D)** Effect of LSD1 stable knock-down on the M.F.E. MCF-7\_shLSD1b and parental cells were cultured under mammosphere forming conditions for 7 days. **(E)** Graphic representation of FACS analysis data for mammospheres derived from MCF7\_shLSD1b cells. Parental MCF-7 cells served as control. **(F)** Representative images of mammospheres derived from parental (n=7) or stable LSD1 knock-down (n=3) MCF-7 cells and parental (n=2) or stable LSD1 knock-down MDA-MB-468 cells (n=1) after 7 days in culture (enlarged images of pictures presented in Figure 2D). **(G)** Western blot analysis of protein lysates after overexpression of LSD1 in MCF-7 and MDA-MB-468 cells. Cells transfected with empty vector served as control. **(H)** Representative images of mammospheres derived from control (n=4) or LSD1-overexpressing (n=9) MCF-7 cells and control (n=3) or LSD1-overexpressing (n=6) MDA-MB-468 cells after 7 days in culture (enlarged images of pictures presented in Figure 2H). Data of at least 2 independent biological experiments are shown. Error bars represent SEM., \*\*:  $p<0.05$ .

**Figure S5. Representative images from orthotopic xenotransplantation assays.** Increasingly diluted single-cell preparations of parental **(A-D)** or stably LSD1 knock-down cells **(H-J)** MDA-MB-468 cells were injected into mice. Mice injected with **(A)**  $5 \times 10^6$ , **(B)**  $1 \times 10^6$  or **(C)**  $1 \times 10^5$  parental MDA-MB-468 cells formed tumors. **(D)** The highest dilution of  $1 \times 10^4$  MDA-MB-468 cells failed to yield any tumors. **(E-G)** Enlarged images of tumors shown in A-C respectively. Mice injected with **(H)**  $5 \times 10^6$ , **(I)**  $1 \times 10^6$  or **(J)**  $1 \times 10^5$  MDA-MB-468-shLSD1a cells failed to form any tumors during the course of the experiment (18 weeks).

**Figure S6 Synergistic action between LSD1 inhibitors and anticancer drugs in 3D tumorspheres.** (A) MCF-7 derived tumorspheres were treated with 2-PCPA (50  $\mu$ M) or GSK-LSD1 (2  $\mu$ M) for 5 days. On the sixth day, doxorubicin (2.5  $\mu$ M) or paclitaxel (15  $\mu$ M) were added for 2 more days. Graphic representation of the negative effects of mono- and combination treatment on the number of MCF-7 tumorspheres (control is set to zero). The dark blue panel depicts the effects of 2-PCPA or GSK-LSD1. The light blue panel depicts the effects of doxorubicin alone or in combination with an LSD1 inhibitor. The grey blue panel depicts the effects of paclitaxel alone or in combination with an LSD1 inhibitor. The dashed lines represent the additive effects of the two agents. The combination effect is higher than the additive suggesting synergy between the two drugs. (B-C) MCF-7 derived tumorspheres were treated with 2-PCPA (50  $\mu$ M) or GSK-LSD1 (2  $\mu$ M) for 5 days, on the sixth day, different concentrations of doxorubicin (0.5-5  $\mu$ M) or paclitaxel (5-25  $\mu$ M) were added for 2 more days. The last day of treatment the number of tumorspheres was counted. Graphic representation of the negative effects on the number of tumorspheres for Doxorubicin (B) and Paclitaxel (C) alone or in combination with 2-PCPA or GSK-LSD1. The dashed lines represent the additive effects of the two agents. The combination effect is higher than the additive suggesting synergy between the two drugs. (D) Graphic representation of the negative effects of combination treatment on MDA-MB-468 tumorspheres following the protocol mentioned above. The dark red panel depicts the effects of 2-PCPA or GSK-LSD1. The red panel depicts the effects of doxorubicin alone or in combination with an LSD1 inhibitor. The orange panel depicts the effects of paclitaxel alone or in combination with an LSD1 inhibitor. The dashed lines represent the additive effects of the two agents. The combination effect is higher suggesting synergy between the two drugs. (E-F) Graphic representation of the negative effects on the number of tumorspheres for Doxorubicin (E) and Paclitaxel (F) alone or in combination with 2-PCPA or GSK-LSD1. The dashed lines represent the additive effect of the two agents. The combination effect is higher suggesting synergy between two drugs. Representative results from one experiment performed in two biological independent replicates with similar results are shown in Figures B, C, E, F. Error bars represent SEM.

**Figure S7. Densitometric analysis of all western blots**

**Table S1. Immunohistochemistry results for CD44 and LSD1 in specimens from 10 (Triple Negative Breast Cancer (TNBC) patients.** Double staining for CD44 and LSD1/KDM1A was performed in Representative formalin-fixed and paraffin-embedded (FFPE) tissue sections from ten patients with TNBC. Each case was evaluated for the percentage of the LSD1/KDM1A and CD44-positive cells as well as the intensity of the LSD1/KDM1A immunostaining. The nuclear immunostaining was semi-quantitatively evaluated as follows: negative (0), weak (1), moderate (2) and strong (3).

Figure S1

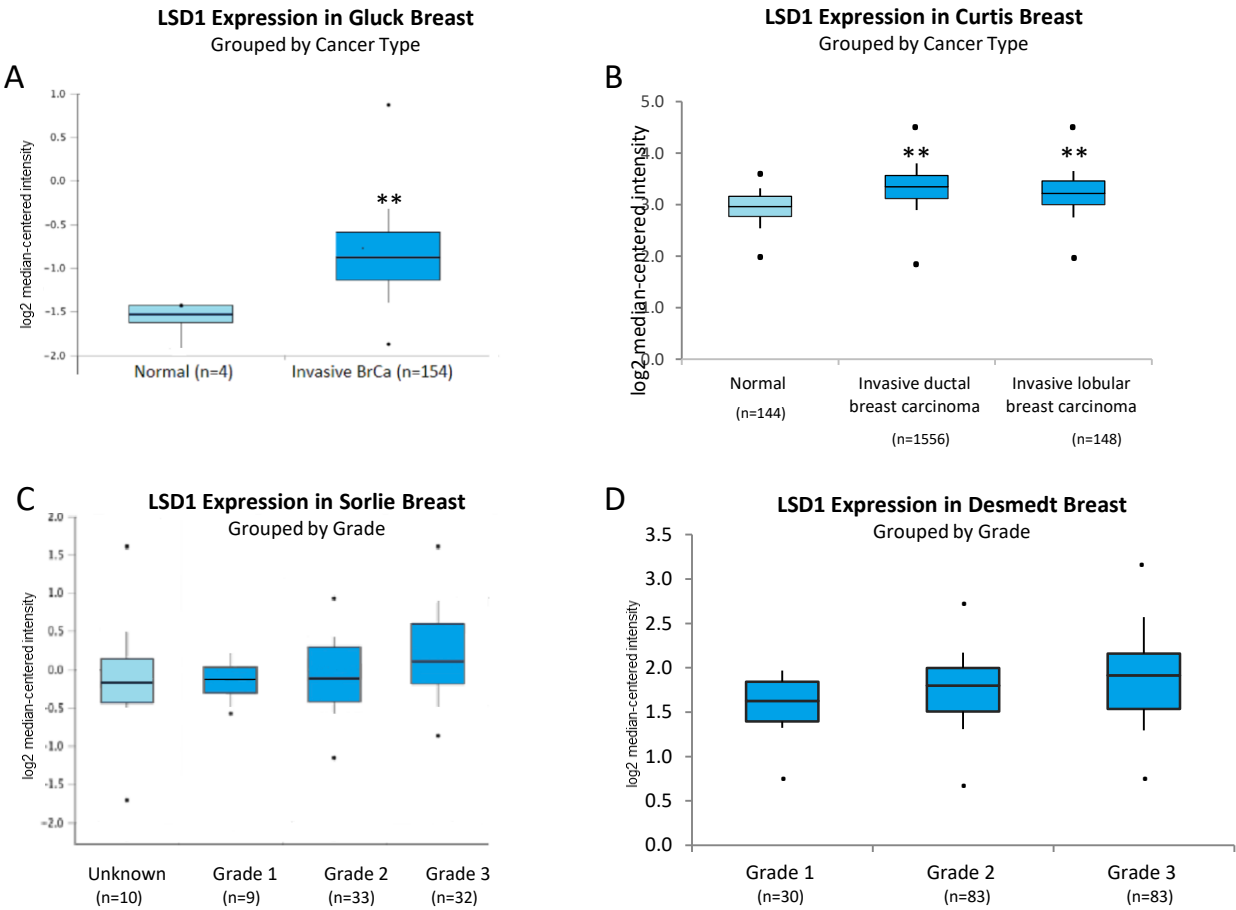

Figure S2

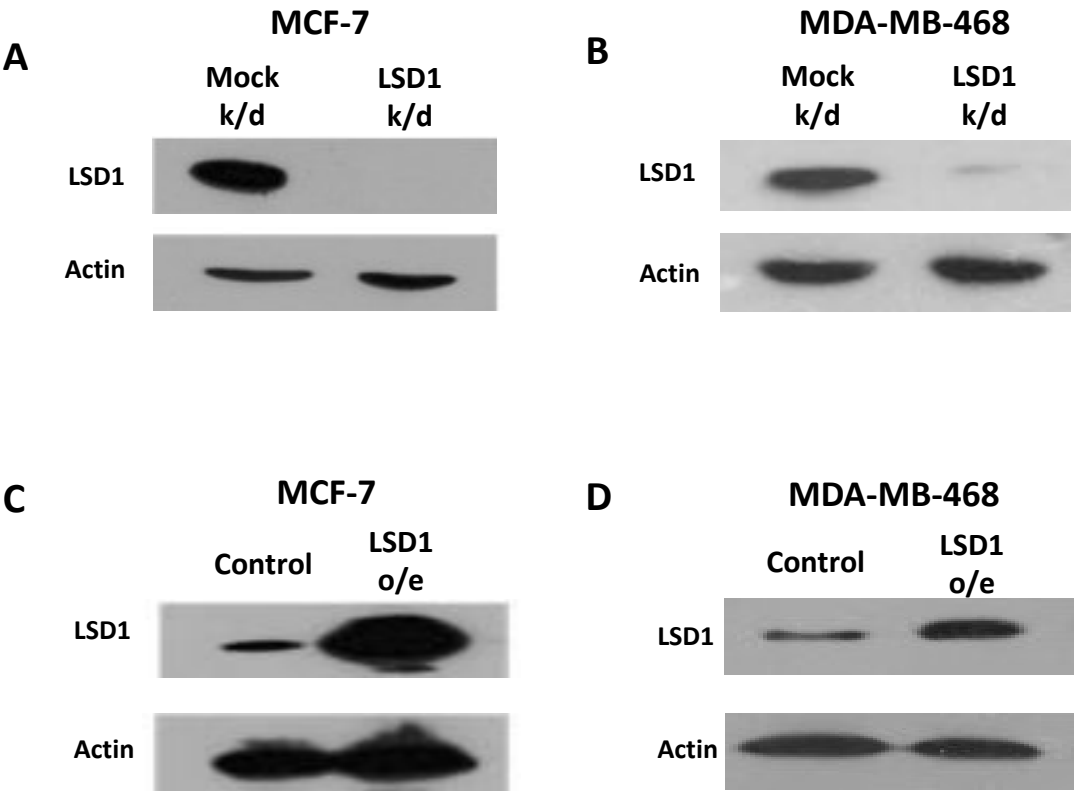

Figure S3

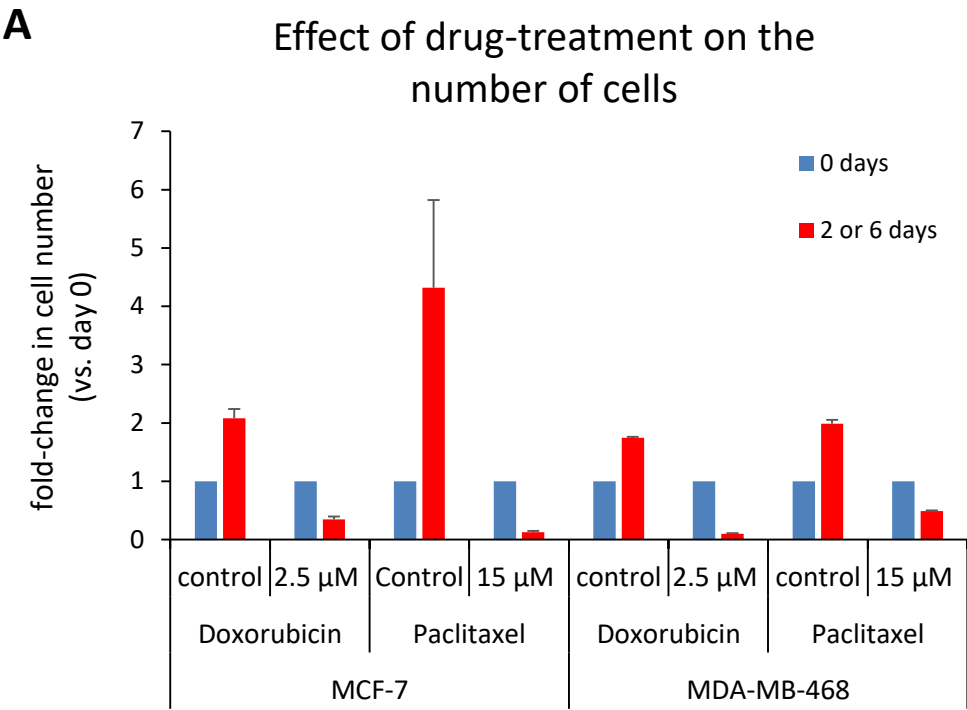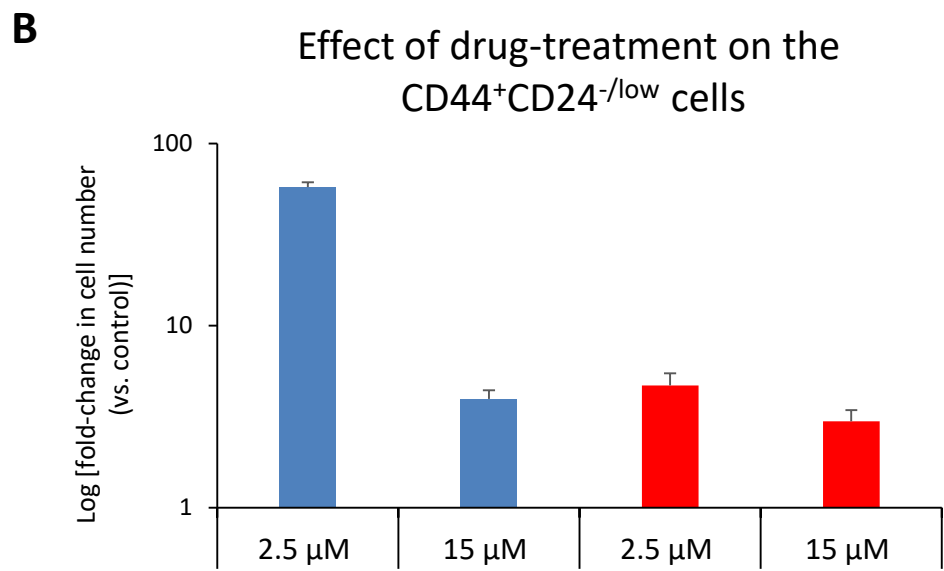

Figure S4

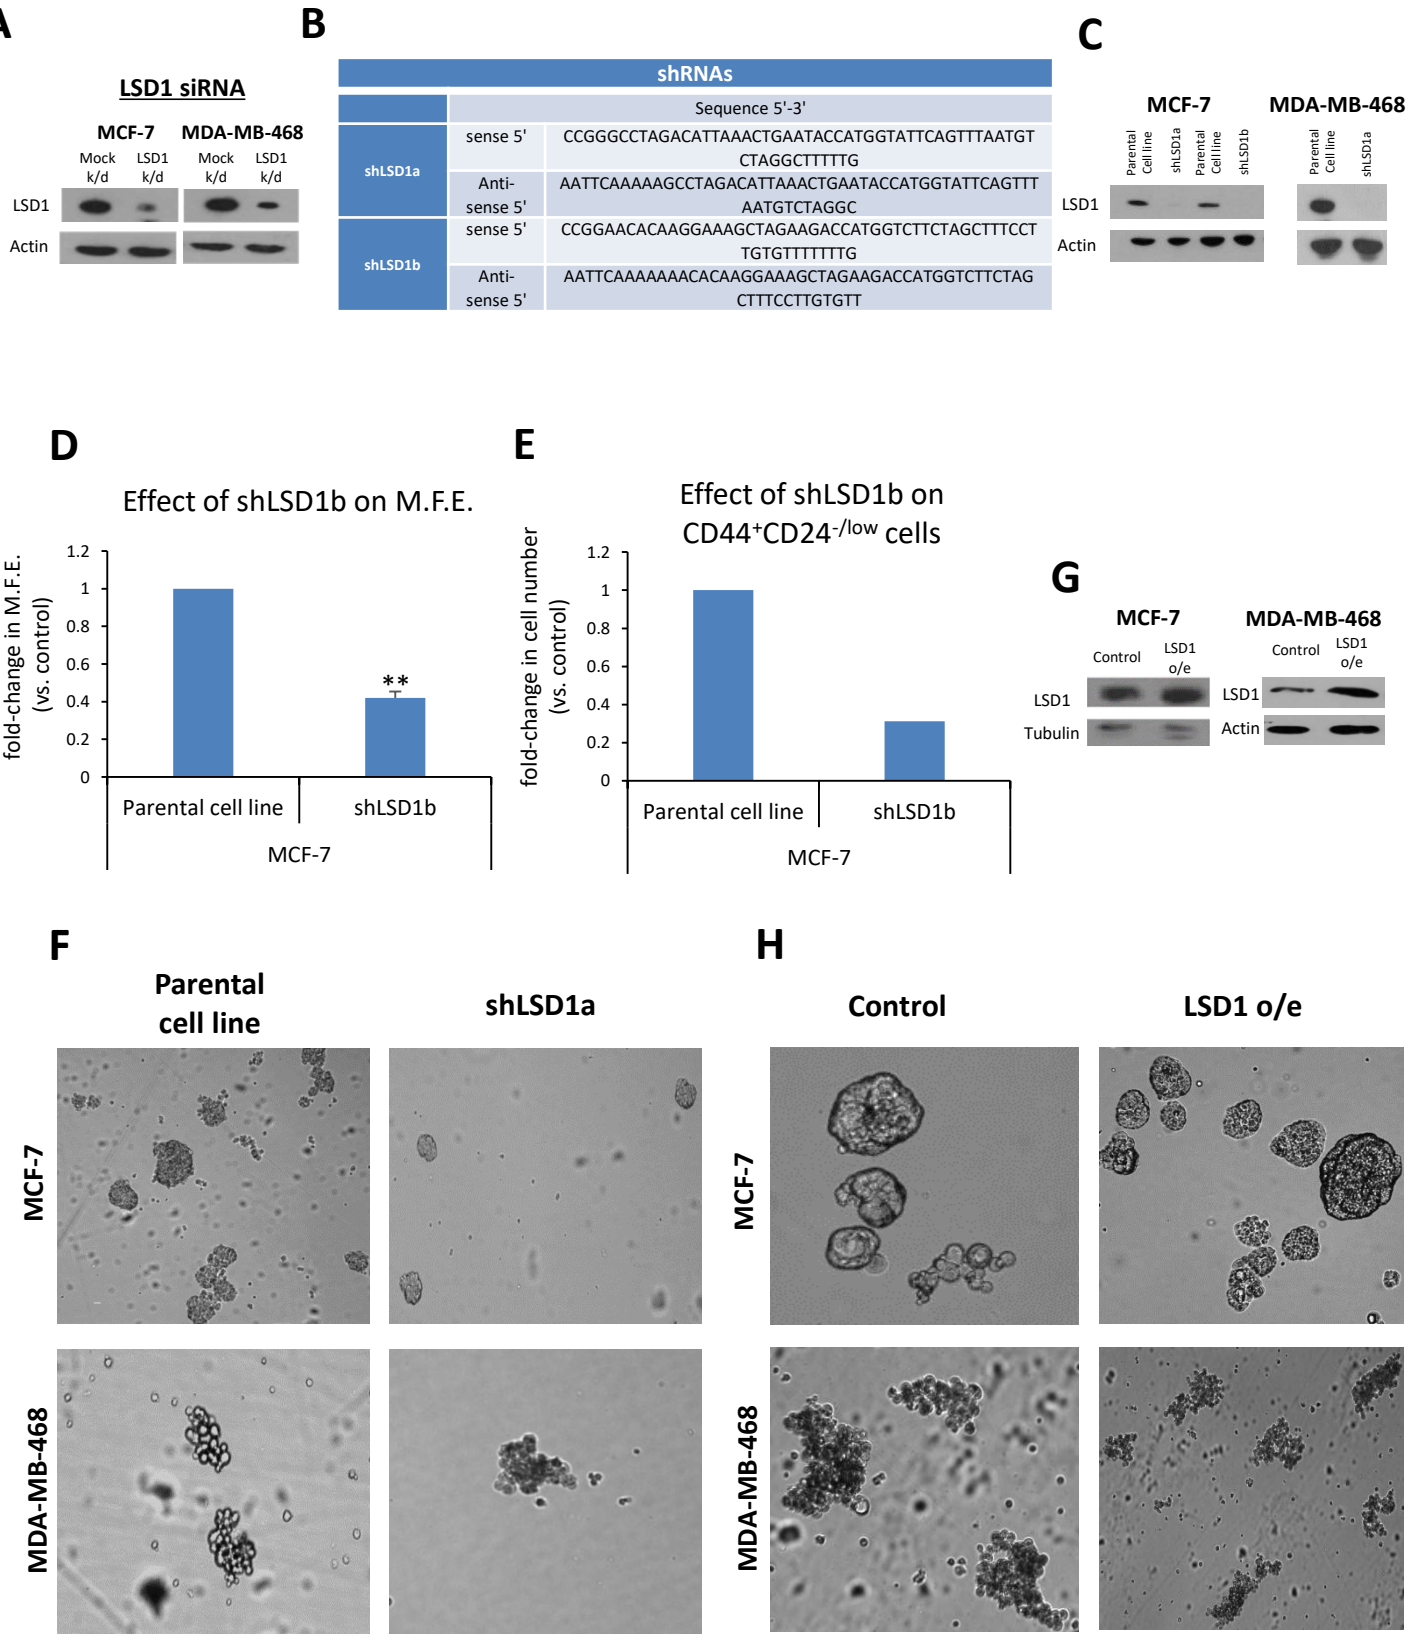

Figure S5

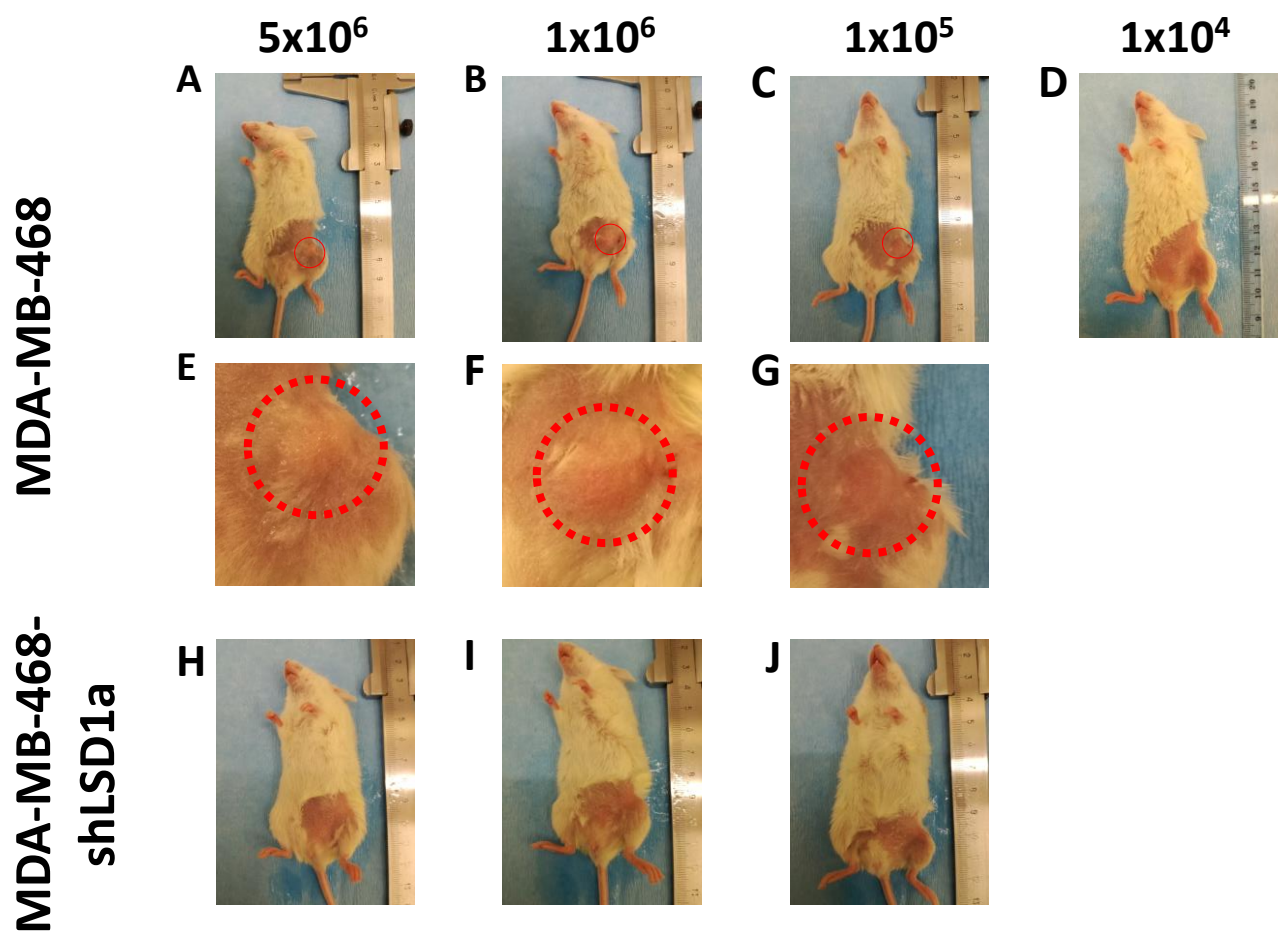

Figure S6

A

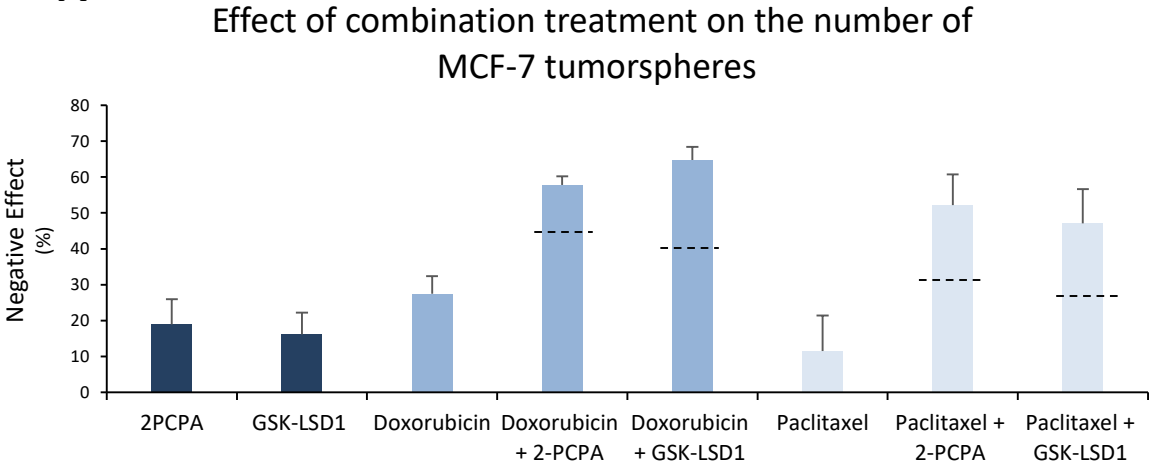

B

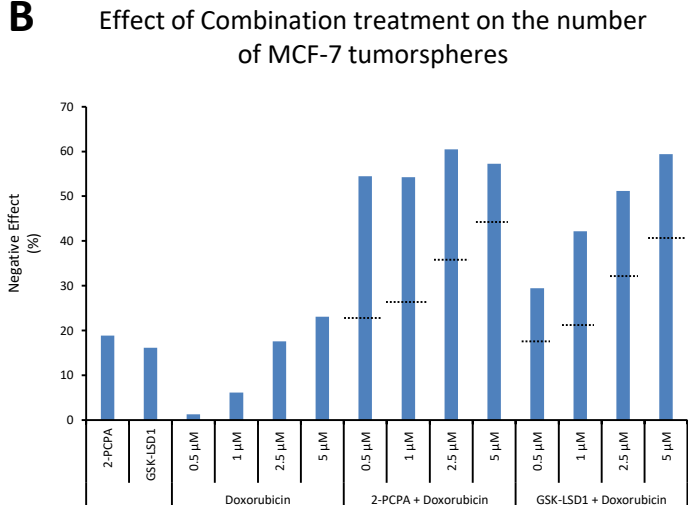

C

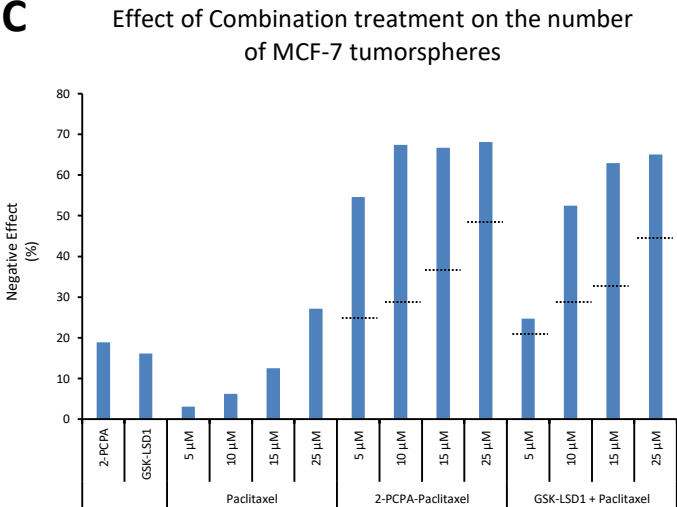

D

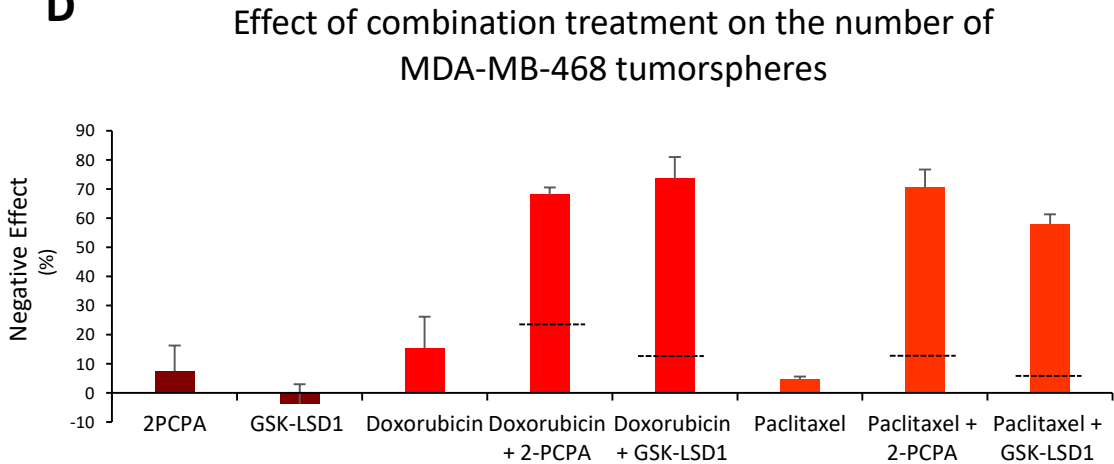

E

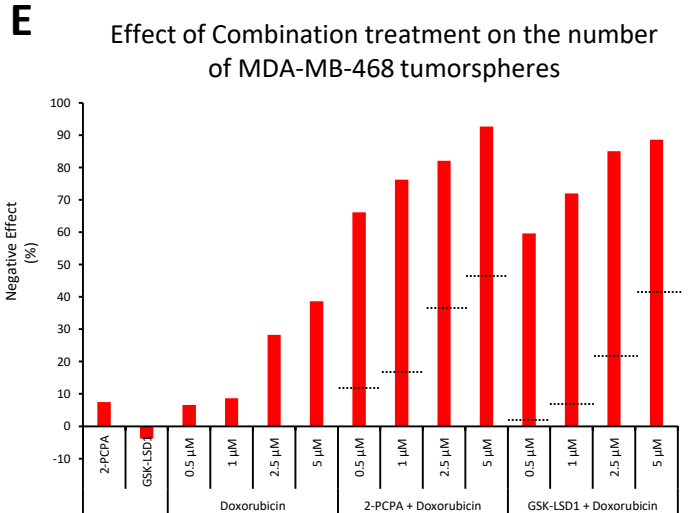

F

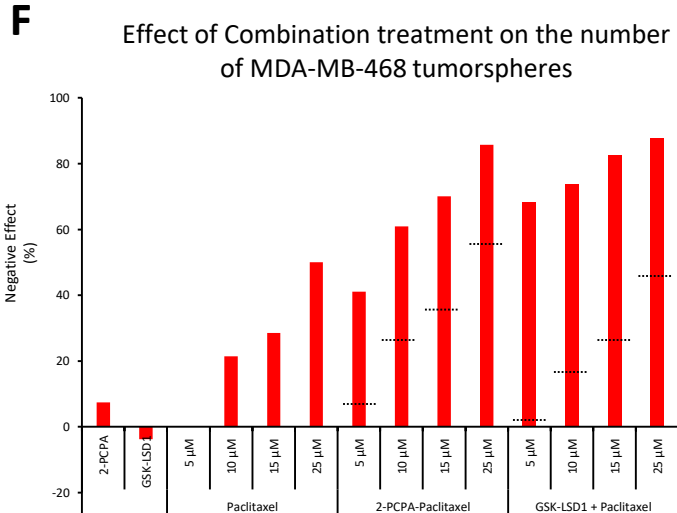

Figure S2

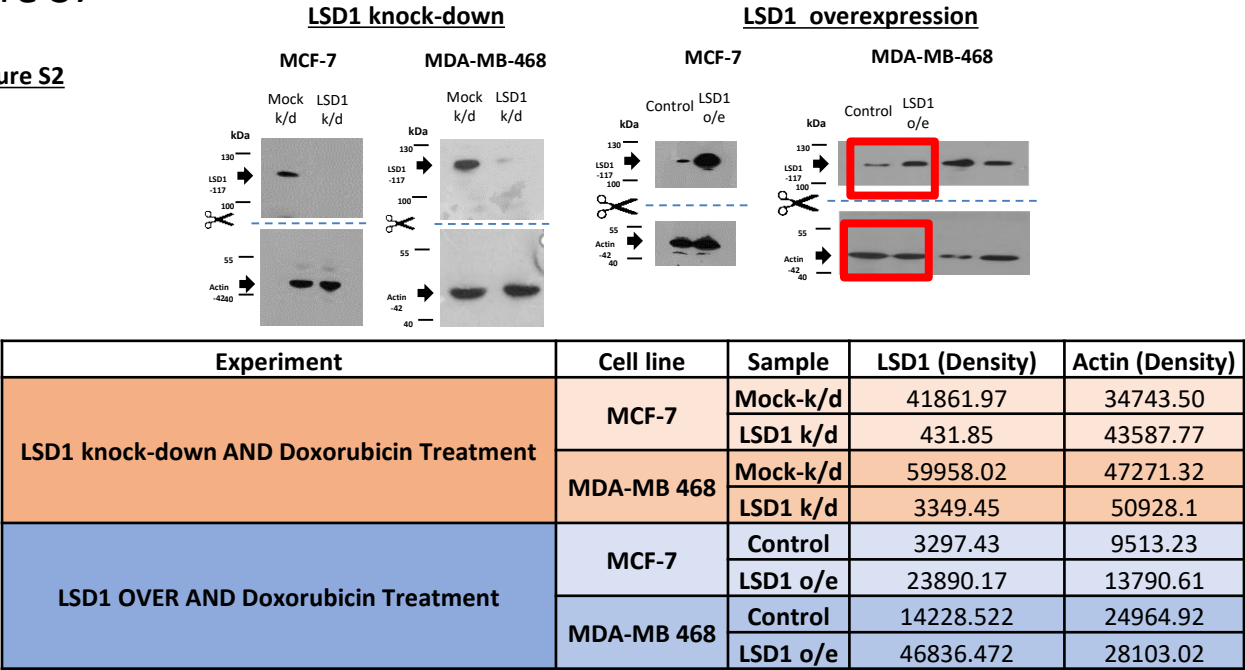

Figure S4

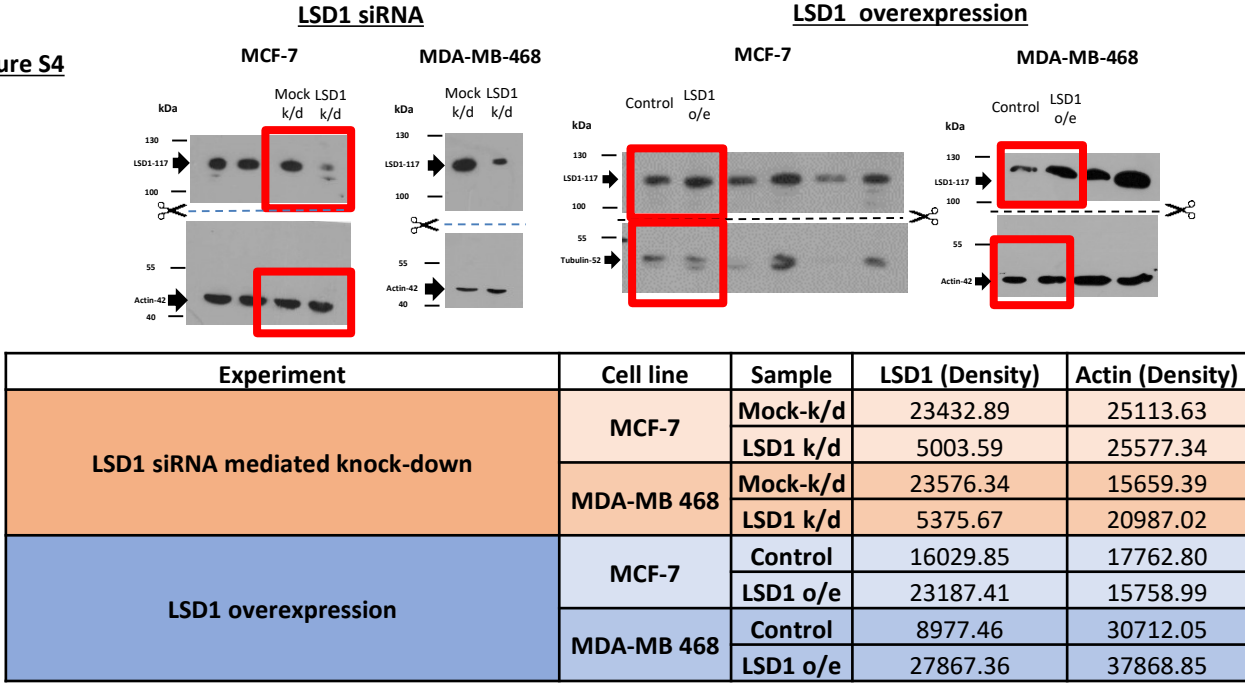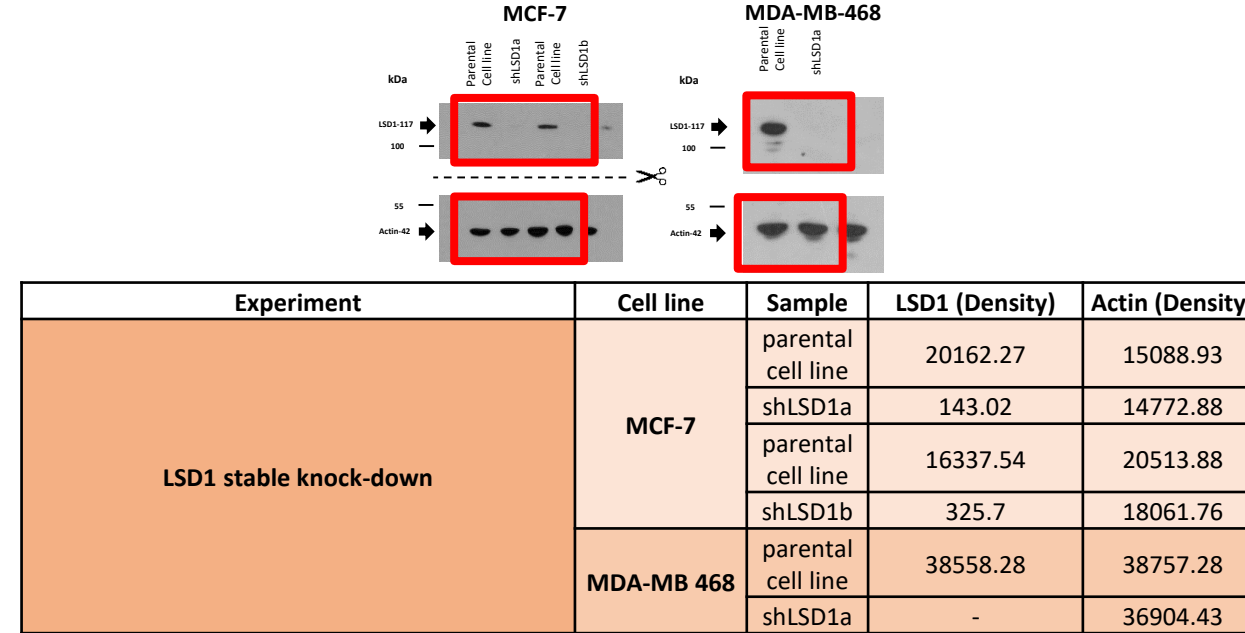

Table S1

| CASE | Grade | CD44 <sup>+</sup>      |     | LSD1/KDM1A             |    |    |    |    |
|------|-------|------------------------|-----|------------------------|----|----|----|----|
|      |       |                        |     | Intensity              | 0  | 1  | 2  | 3  |
| 1    | 2     | % non-neoplastic cells | <1  | % non-neoplastic cells | 30 | 70 | 0  | 0  |
|      |       | % neoplastic cells     | 40  | % neoplastic cells     | 5  | 15 | 30 | 50 |
| 2    | 3     | % non-neoplastic cells | <1  | % non-neoplastic cells | 10 | 40 | 30 | 20 |
|      |       | % neoplastic cells     | 100 | % neoplastic cells     | 0  | 10 | 30 | 60 |
| 3    | 3     | % non-neoplastic cells | <1  | % non-neoplastic cells | 50 | 40 | 10 | 0  |
|      |       | % neoplastic cells     | 99  | % neoplastic cells     | 1  | 39 | 40 | 20 |
| 4    | 3     | % non-neoplastic cells | <1  | % non-neoplastic cells | 70 | 30 | 0  | 0  |
|      |       | % neoplastic cells     | 85  | % neoplastic cells     | 10 | 60 | 25 | 5  |
| 5    | 3     | % non-neoplastic cells | 10  | % non-neoplastic cells | 30 | 40 | 20 | 10 |
|      |       | % neoplastic cells     | 100 | % neoplastic cells     | 0  | 40 | 35 | 25 |
| 6    | 3     | % non-neoplastic cells | 1   | % non-neoplastic cells | 60 | 40 | 0  | 0  |
|      |       | % neoplastic cells     | 95  | % neoplastic cells     | 5  | 35 | 40 | 20 |
| 7    | 3     | % non-neoplastic cells | 30  | % non-neoplastic cells | 50 | 40 | 10 | 0  |
|      |       | % neoplastic cells     | 60  | % neoplastic cells     | 30 | 50 | 15 | 5  |
| 8    | 3     | % non-neoplastic cells | 0   | % non-neoplastic cells | 60 | 40 | 0  | 0  |
|      |       | % neoplastic cells     | 85  | % neoplastic cells     | 5  | 35 | 40 | 20 |
| 9    | 3     | % non-neoplastic cells | 0   | % non-neoplastic cells | 30 | 55 | 15 | 0  |
|      |       | % neoplastic cells     | 80  | % neoplastic cells     | 50 | 30 | 20 | 0  |
| 10   | 3     | % non-neoplastic cells | 0   | % non-neoplastic cells | 25 | 60 | 15 | 0  |
|      |       | % neoplastic cells     | 90  | % neoplastic cells     | 20 | 30 | 40 | 10 |
